# Supplementary material for: Impact of Microclimate on Perception and Physical Activities in Public Spaces of New Urban Areas in Beijing, China
Source: MDPI journal article supplement (doi:10.3390/buildings14041095), 2024-04-14
Supplement: s1 [file s1]

Archive with 2 entries (2 files):
- S1 Original Questionnaire.pdf
- S2 A list of important abbreviations appearing in the article.pdf
