# Supplementary material for: Impact of Microclimate on Perception and Physical Activities in Public Spaces of New Urban Areas in Beijing, China
Source: MDPI journal article supplement (doi:10.3390/buildings14041095), 2024-04-14
Supplement: s1 [file s1]

S2:A list of important abbreviations appearing in the article

|    | Abbreviation     | Full name                                                                 | Explanation                                                                                                                                                                                                                                                                                       | Number of lines of first occurrence |
|----|------------------|---------------------------------------------------------------------------|---------------------------------------------------------------------------------------------------------------------------------------------------------------------------------------------------------------------------------------------------------------------------------------------------|-------------------------------------|
| 1  | UTCI             | universal thermal climate index                                           | It expresses the equivalent ambient temperature of the reference environment to which the human physiological response is the same as the actual environment. This index requires air temperature, relative humidity, wind speed and average radiant temperature to be calculated.                | Line 47                             |
| 2  | T <sub>a</sub>   | air temperature                                                           |                                                                                                                                                                                                                                                                                                   | Line 166                            |
| 3  | RH               | relative humidity                                                         |                                                                                                                                                                                                                                                                                                   | Line 167                            |
| 4  | V <sub>a</sub>   | wind speed                                                                |                                                                                                                                                                                                                                                                                                   | Line 167                            |
| 5  | T <sub>mrt</sub> | average radiant temperature                                               |                                                                                                                                                                                                                                                                                                   | Line 186                            |
| 6  | TSV              | thermal sensation voting                                                  |                                                                                                                                                                                                                                                                                                   | Line 213                            |
| 7  | HSV              | humidity sensation voting                                                 |                                                                                                                                                                                                                                                                                                   | Line 214                            |
| 8  | DSV              | dynamic wind sensation voting                                             |                                                                                                                                                                                                                                                                                                   | Line 214                            |
| 9  | RSV              | radiation temperature sensation voting                                    |                                                                                                                                                                                                                                                                                                   | Line 215                            |
| 10 | OCV              | overall comfort level voting                                              | People's combined subjective assessment of environmental comfort.                                                                                                                                                                                                                                 | Line 215                            |
| 11 | ASHRAE 5         | American Society of Heating, Refrigerating and Air-Conditioning Engineers | Thermal sensation was indicated using the ASHRAE 5-point scale, thermal preference was recorded on a 2-point scale, and thermal acceptability was recorded on a 1-point scale. People's subjective assessment of environmental comfort of TSV, HSV, DSV, RSV, OCV using the ASHRAE 5-point scale. | Line 216                            |
| 12 | STBM             | spatio-temporal behaviour mapping                                         | A quantitative study method for observing people's spatio-temporal behaviour, first proposed by Ziwen Sun in 2020. Specifically, 13                                                                                                                                                               | Line 231                            |

|    |      |                                   |                                                                                                                                                                                                                                                                                                                                                                                                                             |          |
|----|------|-----------------------------------|-----------------------------------------------------------------------------------------------------------------------------------------------------------------------------------------------------------------------------------------------------------------------------------------------------------------------------------------------------------------------------------------------------------------------------|----------|
|    |      |                                   | photos were taken per hour (i.e., a photo was taken every 5 min at each site) at the selected sites. Seven (every 10 min) were input to the GIS database, and remaining six were retained as backup.                                                                                                                                                                                                                        |          |
| 13 | GIS  | Geographic Information System     | In this study, STBM performed data visualisation through GIS platform and different behaviours were expressed on GIS. Figure 3 was expressed in GIS.                                                                                                                                                                                                                                                                        | Line 236 |
| 14 | METs | metabolic equivalents             |                                                                                                                                                                                                                                                                                                                                                                                                                             | Line 244 |
| 15 | H/W  | Height/Width                      | Ratio of the height of the public space to the width of the building on either side                                                                                                                                                                                                                                                                                                                                         | Line 257 |
| 16 | SVF  | sky view factor                   | ratio of the visible sky                                                                                                                                                                                                                                                                                                                                                                                                    | Line 261 |
| 17 | BVF  | building view factor              | ratio of the visible portion of a building                                                                                                                                                                                                                                                                                                                                                                                  | Line 265 |
| 18 | TVF  | tree view factor                  | ratio of the visible trees                                                                                                                                                                                                                                                                                                                                                                                                  | Line 269 |
| 19 | MOCV | mean overall comfort level voting |                                                                                                                                                                                                                                                                                                                                                                                                                             | Line 300 |
| 20 | POE  | post-occupancy evaluation         | It is a systematic and rigorous process of evaluating a building after it has been constructed and used for a period of time. Post-occupancy evaluation focuses on the needs of the users of the building, the success or failure of the building design and the performance of the completed building. Initially used only in the interior of buildings, it is now more commonly used in the exterior spaces of buildings. | Line 585 |
